# Supplementary material
Source: HighWire-hosted journal article supplement (https://journal.pda.org/highwire/filestream/11071/field_highwire_adjunct_files/0/ELSIE_TTC_Data_Master_Sheet.xlsx)
Supplement: ELSIE_TTC_Data_Master_Sheet.xlsx [file ELSIE_TTC_Data_Master_Sheet.xlsx]

## Sheet: QT Expert Review Values Only
Name of Chemical	CAS#	ClassyFire Subclass (Direct Parent)	Study type for POD	Study type if other	Study Duration (# of days)	Route of Administration for POD	Species used to derive POD	POD (NO(A)EL mg/kg/day)	POD (LO(A)EL mg/kg/day if no NO(A)EL is available)	Fraction Bioavailability From Experimental Data based on route, Parenteral = 1	Bioavailability Adjustment factor from experimental data	Expert Review Bioavailability Fraction	Rationale Expert Review Bioavailability Adjustment Factor	Bioavailability Adjustment Factor from Expert review	Biovailability result from ADMET Prediction	Bioavailability assessment factor from ADMET prediction	Final Parenteral Bioavailability Factor (experimental, or expert review / prediction if no experimental is available)	Parenteral POD Based on Bioavailability	Additional Asssesment factor NOAEL = 1; LOAEL severity (none) =3, LOAEL (severity) remaining = 10	Adjustement Chronic=1, subchronic=5, subacute=10, Reprotox = 1 (lifelong exposure)	Chronic=1, subchronic=1, subacute=5, Reprotox = 1 (>1-10 years)	Chronic=1, subchronic=1, subacute=1, Reprotox = 1 (≤1 year)	Modified parenteral administration (POD lifelong exposure mg/kg/day)	Modified parenteral administration (POD 1-10 years mg/kg/day)	Modified parenteral administration (POD <1year mg/kg/day)	Toxicity Link	Bioavailability Link
Triethylene glycol (TEG)	112-27-6	Polyethylene glycols	Subacute		9 (6 hours/day)	Inhalation	Rat	122		1	1				71.28	2	1	122	1	10	5	1	12.2	24.4	122	https://pubmed.ncbi.nlm.nih.gov/16909429/	https://www.sciencedirect.com/science/article/abs/pii/0041008X62900297
2,4-Dichlorophenol	120-83-2	Dichlorobenzenes	Multigenerational Repro/Dev Tox		Female rats were treated from three weeks of age throughout mating (at the age of 90 days), parturition and lactation, and treatment of the progeny continued until 13 weeks of age	Oral Drinking Water	Rat	0.3							86.65	2	2	0.15	1	10	5	1	0.015	0.03	0.15	https://cfpub.epa.gov/ncea/iris/iris_documents/documents/subst/0041_summary.pdf#nameddest=rfd	NA
Isobornyl methacrylate	7534-94-3	Bicyclic monoterpenoids	Subacute		14	Oral Gavage	Rat	25							87.13	2	2	12.5	1	10	5	1	1.25	2.5	12.5	https://echa.europa.eu/registration-dossier/-/registered-dossier/13730/7/6/2	NA
2,6-Dimethylphenol	576-26-1	Ortho cresols	Subacute		14 (6 hours/day, 5 days/week)	Inhalation	Rat	24.4				1	MW <250 Da and inhalation	1	62.68	2	1	24.4	1	10	5	1	2.44	4.88	24.4	https://www.bgrci.de/fileadmin/BGRCI/Downloads/DL_Praevention/Fachwissen/Gefahrstoffe/TOXIKOLOGISCHE_BEWERTUNGEN/Bewertungen/ToxBew138-E.pdf	NA
2,2’-Oxamido bis-[ethyl-3-(3,5-di-t-butyl-4-hydroxyphenyl) propionate]	70331-94-1	Alpha amino acids and derivatives	Subacute		14	Oral Feed	Dog	5300							2.78	10	10	530	1	10	5	1	53	106	530	https://echa.europa.eu/registration-dossier/-/registered-dossier/17394	NA
Methyl 2-mercaptoacetate	2365-48-2	Methyl esters	Subacute		15	Oral Gavage	Rat	10							63.12	2	2	5	1	10	5	1	0.5	1	5	http://documents.tscats.net/file-support/OTS0570921.pdf	NA
2-Octanone	111-13-7	Ketones	Subacute		16	Oral Gavage	Rat	10							55.18	2	2	5	1	10	5	1	0.5	1	5	https://echa.europa.eu/registration-dossier/-/registered-dossier/17424/7/6/2	NA
Linear alkylbenzene sulfonates	68411-30-3	Benzenesulfonic acids and derivatives	Embryo-Fetal		Gestation days 6-15	Oral Gavage	Mouse	2							91.72	1	1	2	1	1	1	1	2	2	2	https://echa.europa.eu/fr/registration-dossier/-/registered-dossier/15879/7/9/3/?documentUUID=d548e241-967c-4eeb-af69-e0c20454b5d5	NA
Tinuvin 144	63843-89-0	Phenylpropanes	Pre, Post-Natal including Maternal Function		Males: 14 days before pairing, and for at least 28 days thereafter. Females: 14 days before pairing, during gestation, during lactation until day 4 post-partum.	Oral Gavage	Rat	2							6.44	10	10	0.2	1	10	5	1	0.02	0.04	0.2	http://documents.tscats.net/file-support/OTS0601392.pdf	NA
2,2,4,6,6-Pentamethylheptane-4-thiol	93002-38-1	Alkylthiols	Subacute		23	Oral Gavage	Rat	6.25							6.47	10	10	0.625	1	10	5	1	0.0625	0.125	0.625	IUCLID Dataset, CAS 25103-58-6, http://www.toxplanet.com	NA
Irgacure 369	119313-12-1	Retro-dihydrochalcones	Subacute		28	Oral Gavage	Rat	10							70.23	2	2	5	1	10	5	1	0.5	1	5	https://echa.europa.eu/fr/registration-dossier/-/registered-dossier/1046	Na
Cyasorb UV-3638	18600-59-4	Benzoxazines	Subacute		28	Oral Gavage	Rat	15							2.06	10	10	1.5	1	10	5	1	0.15	0.3	1.5	https://echa.europa.eu/fr/registration-dossier/-/registered-dossier/11265/7/6/2	NA
2,6-bis(1,1-dimethylethyl)-4-ethyl-phenol	4130-42-1	Phenylpropanes	Subacute		28	Oral Gavage	Rat	15							42.18	10	10	1.5	1	10	5	1	0.15	0.3	1.5	https://hpvchemicals.oecd.org/ui/SIDS_Details.aspx?id=c6f186a9-c76d-435e-a276-8680157ee611	NA
Bis-phenol A	80-05-7	Bisphenols	Multigenerational Repro/Dev Tox		Two generation study	Oral Feed	Mouse	5		0.01	100				73.52	2	100	0.05	1	1	1	1	0.05	0.05	0.05	https://pubmed.ncbi.nlm.nih.gov/18445619/	https://pubmed.ncbi.nlm.nih.gov/26851507/
Cyasorb UV-3529	145849-89-4	N/A	Subacute		28	Oral Gavage	Rat	15							1.05	10	10	1.5	1	10	5	1	0.15	0.3	1.5	https://www.industrialchemicals.gov.au/sites/default/files/NA686%20Public%20Report%20PDF.pdf	NA
Mono-2-(ethylhexyl)phthalate	4376-20-9	Benzoic acid esters	Embryo-Fetal		Gestation days 6-19	Intravenous	Rabbit	5.69		1	1				96.56	1	1	5.69	1	1	1	1	5.69	5.69	5.69	https://pubmed.ncbi.nlm.nih.gov/538762/	NA
Cyclohexyl(dimethoxy)methylsilane	17865-32-6	Alkoxysilanes	Subacute		28	Oral Gavage	Rat	15							69.58	2	2	7.5	1	10	5	1	0.75	1.5	7.5	https://echa.europa.eu/registration-dossier/-/registered-dossier/8528/7/6/2/?documentUUID=9aa9e060-e103-40cb-b147-4262646e7e6c	NA
Decamethyltetrasiloxane	141-62-8	Siloxanes	Subacute		28	Oral Gavage	Rat	25							21.1	10	10	2.5	1	10	5	1	0.25	0.5	2.5	https://echa.europa.eu/registration-dossier/-/registered-dossier/5665/7/6/2	NA
Octamethyltrisiloxane	107-51-7	Siloxanes	Subacute		28	Oral Gavage	Rat	25							43.6	10	10	2.5	1	10	5	1	0.25	0.5	2.5	https://echa.europa.eu/registration-dossier/-/registered-dossier/16055/7/6/1	NA
Irganox 1076	2082-79-3	Fatty alcohol esters	Subacute		28	Oral Gavage	Rat	30		0.3	3.33333				0.24	100	3.33333	9	1	10	5	1	0.9	1.8	9	https://echa.europa.eu/registration-dossier/-/registered-dossier/15217/7/6/2/?documentUUID=2b9c8f9c-bfca-40b6-9424-eda60d7999e4	NA
Naugard 445	10081-67-1	Diphenylmethanes	Subacute		28	Oral Gavage	Rat	40		0.01	100				0.28	100	100	0.4	1	10	5	1	0.04	0.08	0.4	https://echa.europa.eu/registration-dossier/-/registered-dossier/13882/7/6/1	NA
n-Hexadecane	544-76-3	Alkanes	Subacute		28	Oral Feed	Rat	40		0.53	1.88679				0.03	100	1.88679	21.2	1	10	5	1	2.12	4.24	21.2	https://dra4.nihs.go.jp/mhlw_data/home/file/file544-76-3.html	https://pubmed.ncbi.nlm.nih.gov/25868376/
4-Chlorophenol	106-48-9	P-chlorophenols	Subacute		28	Oral Gavage	Rat	100							61.52	2	2	50	1	10	5	1	5	10	50	https://dra4.nihs.go.jp/mhlw_data/home/file/file106-48-9.html	NA
Cyclohexanol	108-93-0	Cyclohexanols	Subacute		28	Intravenous	Rat	100		1	1				57.86	2	1	100	1	10	5	1	10	20	100	https://pubmed.ncbi.nlm.nih.gov/7175969/	NA
3,5-bis(1,1-dimethylethyl)-4-hydroxyl-benzenepropanoic acid, C13-15 alkyl esters	171090-93-0	N/A	Subacute		28	Oral Feed	Rat	100							0.53	100	100	1	1	10	5	1	0.1	0.2	1	https://www.efsa.europa.eu/en/efsajournal/pub/1998	NA
Nonylphenol	25154-52-3	Phenylpropanes	Multigenerational Repro/Dev Tox		Two generation study	Oral Gavage	Rat	10		0.1	10				25.36	10	10	1	1	1	1	1	1	1	1	https://pubmed.ncbi.nlm.nih.gov/11390174/	https://echa.europa.eu/documents/10162/43080e23-3646-4ddf-836b-a248bd4225c6
Benzenepropanoic acid, 3,5-bis(1,1-dimethylethyl)-4-hydroxy-, methyl ester	6386-38-5	Phenylpropanes	Pre, Post-Natal including Maternal Function		Males and females 14 days prior to mating and 14 days post coitum	Oral Gavage	Rat	10		0.39	2.5641				78.09	2	2.5641	3.9	1	10	5	1	0.39	0.78	3.9	https://hpvchemicals.oecd.org/ui/handler.axd?id=c0810d93-34a1-4746-b3d0-f5f82f6cdc1a	https://hpvchemicals.oecd.org/ui/handler.axd?id=c0810d93-34a1-4746-b3d0-f5f82f6cdc1a
Acetaldehyde	75-07-0	Short-chain aldehydes	Subacute		28	Oral Drinking Water	Rat	125		1	1				32.95	10	1	125	1	10	5	1	12.5	25	125	https://echa.europa.eu/registration-dossier/-/registered-dossier/10673/7/6/1	https://www.fsc.go.jp/english/evaluationreports/foodadditive/acetaldehyde_report.pdf
1,3-Diisopropylbenzene	99-62-7	Cumenes	Subchronic		90	Oral Gavage	Rat	300							33.45	10	10	30	1	5	1	1	6	30	30	https://echa.europa.eu/registration-dossier/-/registered-dossier/10411/7/6/1	NA
2-Ethylhexyl mercaptoacetate	7659-86-1	Carboxylic acid esters	Subacute		28	Oral Feed	Rat	170		0.7	1.42857				92.99	1	1.42857	119	1	10	5	1	11.9	23.8	119	https://echa.europa.eu/registration-dossier/-/registered-dossier/13385	https://echa.europa.eu/registration-dossier/-/registered-dossier/13385
1,3-Dihydro-2-benzofura-1-one	87-41-2	Phthalides	Subacute		28	Oral Feed	Rat	319.6							74.62	2	2	159.8	1	10	5	1	15.98	31.96	159.8	https://echa.europa.eu/registration-dossier/-/registered-dossier/20112/7/6/2/?documentUUID=bedf6d19-1cbf-42fd-925b-29580e306242	NA
Fluoride	16984-48-8	Homogeneous halogens	Multigenerational Repro/Dev Tox		Two generation study	Oral Drinking Water	Rat	10.7		0.6	1.66667				71.61	2	1.66667	6.42	1	1	1	1	6.42	6.42	6.42	https://pubmed.ncbi.nlm.nih.gov/11434994/	https://wwwn.cdc.gov/TSP/ToxProfiles/ToxProfiles.aspx?id=212&tid=38
Irganox 1081	90-66-4	Diarylthioethers	Combined Repeat-Dose and Repro/Dev Tox Screening Test		Males 31 days (2 weeks prior to mating, during mating, up until necropsy), Femalse 50-56 days (2 weeks prior to mating, the variable time to conception, the duration of the pregnancy and at least 13 days after delivery up to and including the day before scheduled necropsy)	Oral Gavage	Rat	500							1.3	10	10	50	1	10	5	1	5	10	50	https://echa.europa.eu/it/registration-dossier/-/registered-dossier/24643	NA
Toluene Sulfonic Acid	104-15-4	p-Methylbenzenesulfonates	Subacute		28	Oral (Not Specified)	Rat	500							88.57	2	2	250	1	10	5	1	25	50	250	https://echa.europa.eu/it/registration-dossier/-/registered-dossier/15138/7/6/1	NA
Dodecamethylpentasiloxane	141-63-9	Siloxanes	Subacute		28	Oral Gavage	Rat	1000		0.25	4				9.09	10	4	250	1	10	5	1	25	50	250	https://echa.europa.eu/it/registration-dossier/-/registered-dossier/5714/7/6/1	https://echa.europa.eu/it/registration-dossier/-/registered-dossier/5714/7/2/1
Diethyl adipate	141-28-6	Fatty acid esters	Embryo-fetal		Gestation days 5, 10 , 15	Intraperitoneal	Rat	502							86.01	2	2	251	1	10	5	1	25.1	50.2	251	https://pubmed.ncbi.nlm.nih.gov/4796182/	NA
Dibutyl adipate	105-99-7	Fatty acid esters	Subacute		28	Oral Gavage	Rat	1000							90.44	1	1	1000	1	10	5	1	100	200	1000	https://hpvchemicals.oecd.org/ui/handler.axd?id=F0FA62D5-537B-464E-8465-DB11DF6345F8	NA
4-Nonylphenol (branched)	84852-15-3	1-hydroxy-2-unsubstituted benzenoids	Multigenerational Repro/Dev Tox		Three generation study	Oral Feed	Rat	15							21.8	10	10	1.5	1	1	1	1	1.5	1.5	1.5	https://pubmed.ncbi.nlm.nih.gov/16624851/	NA
Octyl stearate	109-36-4	Wax monoesters	Subacute		28	Oral Gavage	Rat	1000		1	1				0.05	100	1	1000	1	10	5	1	100	200	1000	www.toxplanet.com USEPA Screening-Level Hazard Characterization March 2015	www.toxplanet.com USEPA Screening-Level Hazard Characterization March 2015
Tetraethyleneglycol	112-60-7	Polyethylene glycols	Subacute		28	Oral Drinking Water	Rat	2000							75.57	2	2	1000	1	10	5	1	100	200	1000	https://echa.europa.eu/it/registration-dossier/-/registered-dossier/5383/7/6/1	NA
Dehydroabietic acid	1740-19-8	Diterpenoids	Subacute		28	Oral Feed	Rat	5000							93.7	1	1	5000	1	10	5	1	500	1000	5000	https://pubmed.ncbi.nlm.nih.gov/884336/	NA
4-tert-Octylphenol	140-66-9	Phenylpropanes	Subacute		28	Subcutaneous	Rat		12.5	1	1				34.32	10	1	12.5	3	10	5	1	0.416667	0.833333	4.16667	https://pubmed.ncbi.nlm.nih.gov/10906426/	NA
Tinuvin 329	3147-75-9	Phenyl-1,2,3-triazoles	Subacute		30	Oral Gavage	Rat	5658							59.67	2	2	2829	1	10	5	1	282.9	565.8	2829	www.toxplanet.com USEPA Screening-Level Hazard Characterization September 2009	NA
Benzyl Butyl Phthalate (BBP)	85-68-7	Benzoic acid esters	Multigenerational Repro/Dev Tox		Two generation study	Oral Feed	Rat	20		0.67	1.49254				56.23	2	1.49254	13.4	1	1	1	1	13.4	13.4	13.4	https://pubmed.ncbi.nlm.nih.gov/11099877/	https://pubmed.ncbi.nlm.nih.gov/3959124/
4-hydroxy-4-methyl-2-pentanone	123-42-2	Beta-hydroxy ketones	Subchronic		42 (6 hours/day, 6 days/week)	Inhalation	Rat	34.1				1	MW <250 Da and inhalation	1	75.95	2	1	34.1	1	5	1	1	6.82	34.1	34.1	https://hpvchemicals.oecd.org/UI/handler.axd?id=2025778f-fa53-4c1d-9e47-d1f6579b0f30	NA
Phenyl salicylate	118-55-8	Depsides and depsidones	Subchronic		51	Oral (Not Specified)	Dog	125							92.9	1	1	125	1	5	1	1	25	125	125	https://pubmed.ncbi.nlm.nih.gov/1266737/	NA
2,2’-methylene-bis(6-tert-butyl-4-ethylphenol)	88-24-4	Diphenylmethanes	Chronic		540	Oral Gavage	Rat	12							1.2	10	10	1.2	1	1	1	1	1.2	1.2	1.2	https://pubmed.ncbi.nlm.nih.gov/8821671/	NA
Triphenylphosphine oxide	791-28-6	Phenylphosphines and derivatives	Subchronic		90	Oral Feed	Rat	2							65.3	2	2	1	1	5	1	1	0.2	1	1	https://echa.europa.eu/it/registration-dossier/-/registered-dossier/17507/7/6/2	NA
Irganox 1135	125643-61-0	Fatty alcohol esters	Subchronic		90	Oral Gavage	Rat	3							5.2	10	10	0.3	1	5	1	1	0.06	0.3	0.3	https://www.echa.europa.eu/web/guest/registration-dossier/-/registered-dossier/7061/7/6/1	NA
Butylated hydroxytoluene	128-37-0	Phenylpropanes	Multigenerational Repro/Dev Tox		Two generation study	Oral Feed	Rat	25		0.5	2				42.91	10	2	12.5	1	1	1	1	12.5	12.5	12.5	https://www.efsa.europa.eu/en/efsajournal/pub/2588	https://www.efsa.europa.eu/en/efsajournal/pub/2588
Chimassorb 119	106990-43-6	Tertiary alkylarylamines	Subchronic		90	Oral Feed	Rat	5				0.01	Assumed low bioavailability based on limited prediction models	100			100	0.05	1	5	1	1	0.01	0.05	0.05	https://echa.europa.eu/it/registration-dossier/-/registered-dossier/13733/7/6/1	NA
o-toluenesulfonamide	88-19-7	Benzenesulfonamides	Multigenerational Repro/Dev Tox		Two generation study	Oral Feed	Rat	25							74.01	2	2	12.5	1	1	1	1	12.5	12.5	12.5	https://pubmed.ncbi.nlm.nih.gov/7361306/	https://pubmed.ncbi.nlm.nih.gov/695690/
Di-(2,4-di-tert-butylphenyl) pentaerythritol diphosphite	26741-53-7	Phenylpropanes	Multigenerational Repro/Dev Tox		One generation study	Oral Feed	Rat	25							0.021	100	100	0.25	1	10	5	1	0.025	0.05	0.25	https://echa.europa.eu/it/registration-dossier/-/registered-dossier/5263/7/9/1	NA
Dibutylamine	111-92-2	Dialkylamines	Subchronic		90 (6 hours/day, 5 days/week)	Inhalation	Rat	6.1				1	MW <250 Da and inhalation	1	57.85	2	1	6.1	1	5	1	1	1.22	6.1	6.1	https://echa.europa.eu/registration-dossier/-/registered-dossier/13527/1	NA
Irganox 1790	40601-76-1	Xylenols	Subchronic		90	Oral Feed	Dog	7.5							38.57	10	10	0.75	1	5	1	1	0.15	0.75	0.75	www.toxplanet.com USEPA Screening-Level Hazard Characterization March 2008	NA
Irganox 1520	110553-27-0	Ortho cresols	Subchronic		90	Oral Gavage	Rat	10							0.14	100	100	0.1	1	5	1	1	0.02	0.1	0.1	https://echa.europa.eu/it/registration-dossier/-/registered-dossier/13350/7/6/1	NA
Irganox 1310	20170-32-5	Phenylpropanoic acids	Subchronic		90	Oral Gavage	Rat	10							95.58	1	1	10	1	5	1	1	2	10	10	http://documents.tscats.net/file-support/OTS0539834.pdf	NA
N-Methylpyrrolidone	872-50-4	N-alkylpyrrolidines	Embryo-Fetal		Gestation days 7-20 (6 hours/day)	Inhalation	Rat	26.72				1	ICH Q3C Solvent	1	57.18	2	1	26.72	1	1	1	1	26.72	26.72	26.72	https://pubmed.ncbi.nlm.nih.gov/7935257/	NA
Ethylenediamine	107-15-3	Monoalkylamines	Subchronic		90	Oral Feed	Rat	22		0.8	1.25				43.67	10	1.25	17.6	1	5	1	1	3.52	17.6	17.6	https://echa.europa.eu/it/registration-dossier/-/registered-dossier/15765/7/6/1	https://pubmed.ncbi.nlm.nih.gov/7185622/
Tinuvin 234	70321-86-7	Linear diarylheptanoids	Subchronic		90	Oral Feed	Rat	22							7.11	10	10	2.2	1	5	1	1	0.44	2.2	2.2	https://echa.europa.eu/it/registration-dossier/-/registered-dossier/11135/7/6/2	NA
o-cresol	95-48-7	Ortho cresols	Multigenerational Repro/Dev Tox		Two generation study	Oral Gavage	Rat	30							61.11	2	2	15	1	1	1	1	15	15	15	http://documents.tscats.net/file-support/OTS0529224.pdf	NA
Tinuvin 328	25973-55-1	Phenyl-1,2,3-triazoles	Subchronic		90	Oral Feed	Rat	22							65.08	2	2	11	1	5	1	1	2.2	11	11	www.toxplanet.com USEPA Screening-Level Hazard Characterization September 2009	NA
Methyl 2-benzoylbenzoate	606-28-0	Benzophenones	Combined Repeat-Dose and Repro/Dev Tox Screening Test		Males 30 days (14 days pre-mating and up to 16 days mating/post-mating). Females were dosed for 14 days (pre-mating, during the mating period, through gestation and until the day before the necropsy (at least 4 days post-partum dosing)).	Oral Gavage	Rat	31.25							89.2	2	2	15.625	1	10	5	1	1.5625	3.125	15.625	https://echa.europa.eu/it/registration-dossier/-/registered-dossier/16686/7/6/2	NA
Tinuvin 123	129757-67-1	Fatty acid esters	Subchronic		90	Oral Gavage	Rat	25							37.33	10	10	2.5	1	5	1	1	0.5	2.5	2.5	http://documents.tscats.net/file-support/OTS0600133.pdf	NA
Triallyl cyanurate	101-37-1	Alkoxy-S-triazines	Subchronic		90	Oral Gavage	Rat	30							92.09	1	1	30	1	5	1	1	6	30	30	https://echa.europa.eu/it/registration-dossier/-/registered-dossier/15607/7/6/2	NA
Dibutylmaleate	105-76-0	Fatty acid esters	Subchronic		90	Oral Gavage	Rat		30						92.09	1	1	30	1	5	1	1	6	30	30	https://echa.europa.eu/it/registration-dossier/-/registered-dossier/13495/7/6/2	NA
Topanol CA	1843-03-4	Cinnamylphenols	Subchronic		90	Oral Feed	Rat	38.1							0.3	100	100	0.381	1	5	1	1	0.0762	0.381	0.381	https://echa.europa.eu/it/registration-dossier/-/registered-dossier/5913/7/6/2	NA
p-cresol	106-44-5	Para cresols	Subchronic		90	Oral Gavage	Rat	50		1	1				56.12	2	1	50	1	5	1	1	10	50	50	https://hpvchemicals.oecd.org/ui/handler.axd?id=6e6881e3-00da-4d6c-9a73-43dd886baa4f	https://hpvchemicals.oecd.org/ui/handler.axd?id=6e6881e3-00da-4d6c-9a73-43dd886baa4f
60:40 mixture of m- and p-cresol	1319-77-3	Para cresols	Subchronic		90	Oral Gavage	Rat	50		1	1				56.12	2	1	50	1	5	1	1	10	50	50	https://hpvchemicals.oecd.org/ui/handler.axd?id=6e6881e3-00da-4d6c-9a73-43dd886baa4f	https://hpvchemicals.oecd.org/ui/handler.axd?id=6e6881e3-00da-4d6c-9a73-43dd886baa4f
3,5-di-tertbutyl-4-hydroxyanisole	489-01-0	Methoxyphenols	Subchronic		90	Oral Feed	Rat	50		0.7	1.42857				66.67	2	1.42857	35	1	5	1	1	7	35	35	http://documents.tscats.net/file-support/OTS0545709.pdf	https://pubmed.ncbi.nlm.nih.gov/4768876/
Diisodecylphthalate	26761-40-0	Benzoic acid esters	Embryo-fetal		Gestation days 6-15	Oral Gavage	Rat	40		0.5	2				0.15	100	2	20	1	1	1	1	20	20	20	http://ntp.niehs.nih.gov/ntp/ohat/phthalates/didp/didp_monograph_final.pdf	https://ntp.niehs.nih.gov/ntp/ohat/phthalates/didp/didp_monograph_final.pdf
2-Acetylthiazole	24295-03-2	Aryl ketones	Subchronic		90	Oral Feed	Rat	50							52.52	2	2	25	1	5	1	1	5	25	25	http://www.inchem.org/documents/jecfa/jecmono/v50je12.htm	NA
Irgacure 1173	7473-98-5	Aryl ketones	Subchronic		90	Oral Gavage	Rat	50							75.05	2	2	25	1	5	1	1	5	25	25	https://echa.europa.eu/it/registration-dossier/-/registered-dossier/11211/7/6/2	NA
Chimassorb 2020	192268-64-7	1,3,5-triazine-2,4-diamines	Subchronic		90	Oral Gavage	Rat	50							10.48	10	10	5	1	5	1	1	1	5	5	http://documents.tscats.net/file-support/OTS0559994.pdf	NA
2-ethylhexanoic acid	149-57-5	Medium-chain fatty acids	Subchronic		90	Oral Feed	Rat	61							94.05	1	1	61	1	5	1	1	12.2	61	61	https://pubmed.ncbi.nlm.nih.gov/9662418/	NA
Tinuvin 770	52829-07-9	Fatty acid esters	Subchronic		90	Oral Feed	Dog	70							37.33	10	10	7	1	5	1	1	1.4	7	7	https://echa.europa.eu/it/registration-dossier/-/registered-dossier/14267/7/6/1	NA
2-phenoxylethanol	122-99-6	Phenol ethers	Subchronic		90	Oral Gavage	Rat	80							67.54	2	2	40	1	5	1	1	8	40	40	https://echa.europa.eu/it/registration-dossier/-/registered-dossier/15160/7/6/1	NA
Ethyl Phosphonic Acid Diethyl Ester	78-38-6	Dialkyl alkylphosphonates	Pre, Post-Natal including Maternal Function		Females: - 14-day pre-mating, - 14-day mating (maximum) - 22-day gestation (approximately) - 13-day lactation Males: - 14-day pre-mating, - 14-day mating (maximum)	Oral Gavage	Rat	50							76.05	2	2	25	1	1	1	1	25	25	25	https://echa.europa.eu/it/registration-dossier/-/registered-dossier/26623/7/6/2	NA
Dicumyl peroxide	80-43-3	Phenylpropanes	Subchronic		90	Oral Gavage	Rat	80							49.2	10	10	8	1	5	1	1	1.6	8	8	https://echa.europa.eu/it/registration-dossier/-/registered-dossier/14703/7/6/1	NA
3,4-Dimethylbenzaldehyde	5973-71-7	Benzoyl derivatives	Combined Repeat-Dose and Repro/Dev Tox Screening Test		46	Oral Gavage	Rat	50							69.21	2	2	25	1	10	5	1	2.5	5	25	https://echa.europa.eu/registration-dossier/-/registered-dossier/12006/7/6/2	NA
Millad 3905	32647-67-9	Benzene and substituted derivatives	Subchronic		90	Oral Feed	Dog	91.5							88.67	2	2	45.75	1	5	1	1	9.15	45.75	45.75	https://www.govinfo.gov/content/pkg/FR-2010-01-06/html/E9-31281.htm	NA
Diphenyl Carbonate	102-09-0	Phenoxy compounds	Subchronic		90	Oral Gavage	Rat	50							86.5	2	2	25	1	5	1	1	5	25	25	https://echa.europa.eu/it/registration-dossier/-/registered-dossier/15019/7/6/1	NA
Methacrylic Acid	79-41-4	Carboxylic acids	Subchronic		90 (6 hours/day. 5 days/week)	Inhalation	Mouse	92		0.95	1.05263				76.47	2	1.05263	87.4	1	5	1	1	17.48	87.4	87.4	https://onlinelibrary.wiley.com/doi/full/10.1002/3527600418.mb7941e6018	https://echa.europa.eu/fr/registration-dossier/-/registered-dossier/15411/7/2/1
Cyanoacetic acid, ethyl ester	105-56-6	Carboxylic acid esters	Subchronic		90	Oral Gavage	Rat	100							71.44	2	2	50	1	5	1	1	10	50	50	https://hpvchemicals.oecd.org/UI/handler.axd?id=d7905d93-089d-4280-a030-61dfaf1049a6a	NA
4 aminobenzoic acid	150-13-0	Aminobenzoic acids	Embryo-fetal		Post Coitum days 1-16	Oral Gavage	Rat	50							79.45	2	2	25	1	10	5	1	2.5	5	25	http://ec.europa.eu/health/ph_risk/committees/04_sccp/docs/sccp_o_058.pdf	NA
Cyasorb UV-3346	90751-07-8	Tertiary alkylarylamines	Subchronic		90	Oral Feed	Rat	100							87.63	2	2	50	1	5	1	1	10	50	50	https://efsa.onlinelibrary.wiley.com/doi/pdf/10.2903/j.efsa.2005.273a	NA
2-Hydroxy-4-methoxybenzophenone	131-57-7	Benzophenones	Subchronic		90	Oral Feed	Rat	100							89.71	2	2	50	1	5	1	1	10	50	50	https://ec.europa.eu/health/ph_risk/committees/04_sccp/docs/sccp_o_078.pdf	NA
Acrylic acid	79-10-7	Acrylic acids	Multigenerational Repro/Dev Tox		Two generation study	Oral Drinking Water	Rat	53		1	1				77.93	2	1	53	1	1	1	1	53	53	53	https://pubmed.ncbi.nlm.nih.gov/9409626/	https://onlinelibrary.wiley.com/doi/epdf/10.1002/3527600418.mb7910e0026
n-Butyl Methacrylate	97-88-1	Alpha,beta-unsaturated carboxylic esters	Subchronic		90	Oral Gavage	Rat	120		1	1				84.52	2	1	120	1	5	1	1	24	120	120	https://echa.europa.eu/registration-dossier/-/registered-dossier/15151/7/6/2	https://echa.europa.eu/fr/registration-dossier/-/registered-dossier/15151/7/2/1
Triphenyl phosphate	115-86-6	Aryl phosphotriesters	Subchronic		90	Oral Feed	Rat	105							23.8	10	10	10.5	1	5	1	1	2.1	10.5	10.5	https://echa.europa.eu/registration-dossier/-/registered-dossier/15972/7/6/2	NA
Triethylene glycol bis(2-ethylhexanoate)	94-28-0	Fatty acid esters	Subchronic		90	Oral Gavage	Rat	120		1	1				38.65	10	1	120	1	5	1	1	24	120	120	https://echa.europa.eu/registration-dossier/-/registered-dossier/15760/7/6/2	https://www.sciencedirect.com/science/article/abs/pii/0041008X62900297
Polypropylene Glycol	25322-69-4	Secondary alcohols	Subchronic		90 (6 hours/day, 5 days/week)	Inhalation	Rat	122.8				1	MW <250 Da and inhalation	1	74.49	2	1	122.8	1	5	1	1	24.56	122.8	122.8	https://pubmed.ncbi.nlm.nih.gov/2807102/	NA
Fluorene	86-73-7	Fluorenes	Subchronic		90	Oral Gavage	Mouse	125							18.82	10	10	12.5	1	5	1	1	2.5	12.5	12.5	https://iris.epa.gov/static/pdfs/0435_summary.pdf	NA
4-tert-Butylphenol	98-54-4	Phenylpropanes	Multigenerational Repro/Dev Tox		Two generation study (10 weeks prior to mating, throughout mating, gestation, and lactation until termination)	Oral Feed	Rat	70		0.73	1.36986				66.15	2	1.36986	51.1	1	1	1	1	51.1	51.1	51.1	https://echa.europa.eu/fr/registration-dossier/-/registered-dossier/15260/7/9/2	https://echa.europa.eu/fr/registration-dossier/-/registered-dossier/15260/7/2/2
Irganox 1035	41484-35-9	Phenylpropanes	Subchronic		90	Oral Feed	Rat	138							1.17	10	10	13.8	1	5	1	1	2.76	13.8	13.8	https://echa.europa.eu/fr/registration-dossier/-/registered-dossier/10242/7/6/2	NA
Butanal (Butyraldehyde)	123-72-8	Alpha-hydrogen aldehydes	Subchronic		90	Oral	Mouse	150							38.99	10	10	15	1	5	1	1	3	15	15	https://echa.europa.eu/fr/registration-dossier/-/registered-dossier/15033/7/6/2/?documentUUID=6fa76f81-56dc-44d8-b949-02db7b03b159	NA
Hexamethylcyclotrisiloxane	541-05-9	Organoheterosilanes	Subchronic		90 (6 hours/day, 5 days/week)	Inhalation	Rat	170				0.05	Data on inhaled higher MW siloxanes	20	73.48	2	20	8.5	1	5	1	1	1.7	8.5	8.5	https://echa.europa.eu/fr/registration-dossier/-/registered-dossier/14554/7/6/3	NA
Acenaphthene	83-32-9	Naphthalenes	Subchronic		90	Oral Gavage	Mouse	175							45.22	10	10	17.5	1	5	1	1	3.5	17.5	17.5	https://cfpub.epa.gov/ncea/iris/iris_documents/documents/subst/0442_summary.pdf	NA
Uvinul 400	131-56-6	Benzophenones	Subchronic		90	Oral Feed	Rat	236							93.43	1	1	236	1	5	1	1	47.2	236	236	https://www.cir-safety.org/sites/default/files/Benzophenones.pdf	NA
4-tert-Amylphenol	80-46-6	Phenylpropanes	Subchronic		90	Oral Gavage	Rat	200							61.73	2	2	100	1	5	1	1	20	100	100	https://echa.europa.eu/fr/registration-dossier/-/registered-dossier/14435/7/6/2	NA
Diethylene Glycol Ethyl Ether	111-90-0	Dialkyl ethers	Subchronic		90	Oral Feed	Rat	250		0.9	1.11111				63.9	2	1.11111	225	1	5	1	1	45	225	225	https://echa.europa.eu/fr/registration-dossier/-/registered-dossier/15867/7/6/2/?documentUUID=da95a5b1-b05e-45b0-86d3-103f718e7c3c	https://echa.europa.eu/fr/registration-dossier/-/registered-dossier/15867/7/2/1
Caprolactam	105-60-2	Caprolactams	Multigenerational Repro/Dev Tox		Three generation study	Oral	Rat	83							59.21	2	2	41.5	1	1	1	1	41.5	41.5	41.5	https://pubmed.ncbi.nlm.nih.gov/3183293/	NA
2-(2-(Butoxyethoxy)ethanol acetate	124-17-4	Carboxylic acid esters	Subchronic		90	Oral Drinking Water	Rat	250				1	Similar properties as ICH Q3C solvent	1	80.72	2	1	250	1	5	1	1	50	250	250	https://echa.europa.eu/fr/registration-dossier/-/registered-dossier/14826/7/6/2	NA
Acetophenone	98-86-2	Aryl ketones	Subchronic		90	Oral Gavage	Rat	250		0.5	2				59.73	2	2	125	1	5	1	1	25	125	125	https://echa.europa.eu/fr/registration-dossier/-/registered-dossier/14683/7/6/2/?documentUUID=6ac874a6-6c60-4f04-a274-09800da42250	http://www.inchem.org/documents/jecfa/jecmono/v48je13.htm
p-Toluenesulfonamide	70-55-3	P-toluenesulfonamides	Subchronic		90	Oral Feed	Dog	255		1	1				70.86	2	1	255	1	5	1	1	51	255	255	https://echa.europa.eu/fr/registration-dossier/-/registered-dossier/10745/7/6/2	https://echa.europa.eu/fr/registration-dossier/-/registered-dossier/10745/7/2/1
Di-(2-ethylhexyl) adipate	103-23-1	Fatty acid esters	Subchronic		90	Oral Feed	Rat	282							2.16	10	10	28.2	1	5	1	1	5.64	28.2	28.2	https://pubmed.ncbi.nlm.nih.gov/9355940/	NA
Benzaldehyde	100-52-7	Benzoyl derivatives	Subchronic		90	Oral Gavage	Rat	286		0.9	1.11111				57.58	2	1.11111	257.4	1	5	1	1	51.48	257.4	257.4	https://pubmed.ncbi.nlm.nih.gov/6683220/	https://hpvchemicals.oecd.org/ui/handler.axd?id=aa89d225-a2a7-4ed5-b8d6-c06b5e30b45b
Irganox 245	36443-68-2	Phenylpropanes	Subchronic		90	Oral (Not Specified)	Dog	300		0.335	2.98507				10.38	10	2.98507	100.5	1	5	1	1	20.1	100.5	100.5	https://echa.europa.eu/fr/registration-dossier/-/registered-dossier/13215/7/6/2	https://echa.europa.eu/fr/registration-dossier/-/registered-dossier/13215/7/2/1
Irgacure 184	947-19-3	Aryl ketones	Subchronic		90	Oral Gavage	Rat	300							82.43	2	2	150	1	5	1	1	30	150	150	https://echa.europa.eu/fr/registration-dossier/-/registered-dossier/1936/7/6/2	NA
Trimethacrylate ester	3290-92-4	Tricarboxylic acids and derivatives	Subchronic		90	Oral Gavage	Rat	300							92.67	1	1	300	1	5	1	1	60	300	300	https://echa.europa.eu/fr/registration-dossier/-/registered-dossier/13937/7/6/2	NA
1,4-Peroxide curative (Ethanone, 1-[4-[1-[(1,1-dimethylethyl)dioxy]-1-methylethyl]phenyl]-)	25155-25-3	Phenylpropanes	Multigenerational Repro/Dev Tox		44 (Females: Pre-pairing (14 days), pairing, gestation (21 days), lactation periods (until day 4 of post-partum) Males: dosing continued until the first dams had reached day 4 post partum)	Oral Gavage	Rat	100							5.84	10	10	10	1	10	5	1	1	2	10	https://echa.europa.eu/fr/registration-dossier/-/registered-dossier/15785/7/9/2	NA
Butylated Hydroxyanisole (BHA)	25013-16-5	Methoxyphenols	Multigenerational Repro/Dev Tox		Multigenerational (Parental animals: 2 weeks prior to mating, during the 2-week mating period, through gestation, lactation, until sacrifice)	Oral Feed	Rat	10		0.5	2				82.45	2	2	5	1	10	5	1	0.5	1	5	https://pubmed.ncbi.nlm.nih.gov/15664432/	https://echa.europa.eu/it/registration-dossier/-/registered-dossier/15988/7/2/1
Di-tert-butylperoxide	110-05-4	Dialkyl peroxides	Combined Repeat-Dose and Repro/Dev Tox Screening Test		Both sexes: 14 days prior to pairing and during the pairing period. Females: throughout pregnancy and up to day 4 of lactation. Males: until the first dams had reached day 4 post partum (42 days of administration)	Oral Gavage	Rat	300							55.04	2	2	150	1	10	5	1	15	30	150	https://echa.europa.eu/fr/registration-dossier/-/registered-dossier/14549/7/6/2	NA
1,4-Butanediol	110-63-4	Primary alcohols	Other	Developmental toxicity study, but neurotoxic effect observed during first 4h following daily exposure	9	Oral Gavage	Mouse	100				1	Similar properties as ICH Q3C solvent	1	58.27	2	1	100	1	10	5	1	10	20	100	https://echa.europa.eu/fr/registration-dossier/-/registered-dossier/15496/7/9/3/?documentUUID=b1582342-579b-430b-9890-04e550ca1b10	NA
Bis(3,4-dimethylbenzylidene) sorbitol	135861-56-2	o-Xylenes	Subchronic		90	Oral Feed	Rat	406.4							64.24	2	2	203.2	1	5	1	1	40.64	203.2	203.2	https://echa.europa.eu/fr/registration-dossier/-/registered-dossier/16719/7/6/2	NA
1-Hexene	592-41-6	Unsaturated aliphatic hydrocarbons	Subchronic		90 (6 hours/day, 5 days/week)	Inhalation	Rat	421				1	MW <250 Da and inhalation	1	41.97	10	1	421	1	5	1	1	84.2	421	421	https://hpvchemicals.oecd.org/ui/handler.axd?id=19f3e277-fc51-4110-a9a8-1e2281d8a6b4	NA
Diethyl Ether	60-29-7	Dialkyl ethers	Subchronic		90	Oral Gavage	Rat	500				1	ICH Q3C Solvent	1	33.8	10	1	500	1	5	1	1	100	500	500	https://cfpub.epa.gov/ncea/pprtv/documents/EthylEther.pdf	NA
Sodium 2,2’-methylene bis(4,6-di-tert-butylphenyl) phosphate	85209-91-2	Aryl phosphodiesters	Subchronic		90	Oral Gavage	Rat	500							15.15	10	10	50	1	5	1	1	10	50	50	https://www.industrialchemicals.gov.au/sites/default/files/STD1167%20Public%20Report%20PDF.pdf	NA
Hexane	110-54-3	Alkanes	Subchronic		90	Oral Gavage	Rat	568		0.9	1.11111				34.09	10	1.11111	511.2	1	5	1	1	102.24	511.2	511.2	https://echa.europa.eu/fr/registration-dossier/-/registered-dossier/15741/7/6/2	https://pubmed.ncbi.nlm.nih.gov/25868376/
Irganox MD 1024	32687-78-8	Phenylpropanes	Subchronic		90	Oral Feed	Rat	624							3.22	10	10	62.4	1	5	1	1	12.48	62.4	62.4	https://echa.europa.eu/fr/registration-dossier/-/registered-dossier/5967/7/6/2	NA
Tinuvin 120	4221-80-1	Depsides and depsidones	Subchronic		90	Oral Feed	Dog	690							0.85	100	100	6.9	1	5	1	1	1.38	6.9	6.9	https://echa.europa.eu/fr/registration-dossier/-/registered-dossier/16532/7/6/2	NA
Acetyl Tributyl Citrate	77-90-7	Tetracarboxylic acids and derivatives	Subchronic		90 (with an in utero exposure phase)	Oral Feed	Rat	103		0.67	1.49254				79.24	2	1.49254	69.01	1	5	1	1	13.802	69.01	69.01	http://www.epa.gov/chemrtk/pubs/summaries/acetlcit/c15025tc.htm	https://echa.europa.eu/fr/registration-dossier/-/registered-dossier/13143/7/2/1
Erucamide	112-84-5	Fatty amides	Subchronic		90	Oral Gavage	Rat	1000							0.78	100	100	10	1	5	1	1	2	10	10	https://echa.europa.eu/fr/registration-dossier/-/registered-dossier/14899/7/6/2	https://echa.europa.eu/fr/registration-dossier/-/registered-dossier/14899/7/2/1
Dioctyl Sulfosuccinic Acid	577-11-7	Fatty acid esters	Subchronic		90	Oral Feed	Rat	1000		0.05	20				86.53	2	20	50	1	5	1	1	10	50	50	https://echa.europa.eu/fr/registration-dossier/-/registered-dossier/16066/7/6/2	https://echa.europa.eu/fr/registration-dossier/-/registered-dossier/16066/7/2/1
1-formyl-piperidine	2591-86-8	Piperidines	Embryo-Fetal		Gestation days 6-20	Oral Gavage	Rat	110							55.76	2	2	55	1	10	5	1	5.5	11	55	https://pubmed.ncbi.nlm.nih.gov/1601215/	NA
Anthracene	120-12-7	Anthracenes	Subchronic		90	Oral Gavage	Mouse	1000		0.5	2				27.85	10	2	500	1	5	1	1	100	500	500	http://cfpub.epa.gov/ncea/iris/iris_documents/documents/subst/0434_summary.pdf	http://echa.europa.eu/information-on-chemicals/information-from-existing-substances-regulation
Sulfur	7704-34-9	Other non-metal sulfides	Subchronic		90	Oral Gavage	Rat	1000							34.2	10	10	100	1	5	1	1	20	100	100	https://echa.europa.eu/fr/registration-dossier/-/registered-dossier/15564/7/6/2	NA
Irganox 5057	15721-78-5	Phenylpropanes	Subacute		14	Oral Gavage	Rat	600							0.04	100	100	6	1	10	5	1	0.6	1.2	6	https://echa.europa.eu/fr/registration-dossier/-/registered-dossier/5282/7/9/2	NA
Acetone	67-64-1	Ketones	Subchronic		90	Oral Drinking Water	Rat	1050				1	ICH Q3C Solvent	1	49.61	10	1	1050	1	5	1	1	210	1050	1050	https://database.ich.org/sites/default/files/ICH_Q3C-R8_Guideline_Step4_2021_0422_1.pdf	https://database.ich.org/sites/default/files/ICH_Q3C-R8_Guideline_Step4_2021_0422_1.pdf
N,N-Dibutylformamide	761-65-9	Tertiary carboxylic acid amides	Embryo-Fetal		Post coitum days 6-18	Oral Gavage	Rabbit	125							65	2	2	62.5	1	10	5	1	6.25	12.5	62.5	https://echa.europa.eu/fr/registration-dossier/-/registered-dossier/24019/7/9/1	NA
Di-p-methylbenzylidenesorbitol	81541-12-0	Toluenes	Subchronic		90	Oral Feed	Rat	1500							84.28	2	2	750	1	5	1	1	150	750	750	https://www.industrialchemicals.gov.au/sites/default/files/NA132%20Public%20Report%20PDF.pdf	NA
Cyasorb UV-1164	2725-22-6	Phenol ethers	Subchronic		90	Oral Feed	Rat	1632							1.22	10	10	163.2	1	5	1	1	32.64	163.2	163.2	https://efsa.onlinelibrary.wiley.com/doi/epdf/10.2903/j.efsa.2011.2001	NA
Mark PEP 36	80693-00-1	Phenylpropanes	Subchronic		90	Oral (Not Specified)	Dog	2000							0.021	100	100	20	1	5	1	1	4	20	20	https://echa.europa.eu/fr/registration-dossier/-/registered-dossier/6122/7/6/2/?documentUUID=b755db64-ebb6-4f23-a001-81e4758184aa	NA
1-Octanol	111-87-5	Fatty alcohols	Embryo-Fetal		Gestation days 6-15	Oral Gavage	Rat	130				1	Similar properties as ICH Q3C solvent	1	52.33	2	1	130	1	10	5	1	13	26	130	https://echa.europa.eu/fr/registration-dossier/-/registered-dossier/15210/7/9/3/?documentUUID=5421e671-4845-40af-b8f4-17d12f2c0c40	NA
Dioctadecyl disulfide	2500-88-1	Dialkyldisulfides	Subchronic		90	Oral Feed	Rat		70						0.01	100	100	0.7	3	5	1	1	0.0466667	0.233333	0.233333	https://echa.europa.eu/fr/registration-dossier/-/registered-dossier/32156/7/6/2/?documentUUID=615ab109-1270-49ae-88d2-74ebcb44d1f4	NA
Acenaphthylene	208-96-8	Acenaphthylenes	Subchronic		90	Oral	Mouse		175						45.35	10	10	17.5	3	5	1	1	1.16667	5.83333	5.83333	https://iris.epa.gov/static/pdfs/0442_summary.pdf	NA
Mercaptobenzothiazole - MBT	149-30-4	Benzothiazoles	Subchronic		90	Oral Gavage	Rat		188	1	1				80.29	2	1	188	10	5	1	1	3.76	18.8	18.8	https://ntp.niehs.nih.gov/go/tr332	https://echa.europa.eu/fr/registration-dossier/-/registered-dossier/13432/7/2/1
2,4-Di-tert-butylphenol (Irgafos 168 degradation product)	96-76-4	Phenylpropanes	Pre, Post-Natal including Maternal Function		Females: 28 days prior to mating and throughout mating, gestation and lactation Males: 28 days prior to mating and throughout mating, during mating, and until conception was established in females	Oral Feed	Rat	150							55.86	2	2	75	1	10	5	1	7.5	15	75	https://echa.europa.eu/fr/registration-dossier/-/registered-dossier/14828/7/9/1	NA
2-Benzoylbenzoic acid	85-52-9	Benzophenones	Combined Repeat-Dose and Repro/Dev Tox Screening Test		28	Oral Gavage	Rat	150							96.24	1	1	150	1	10	5	1	15	30	150	https://echa.europa.eu/fr/registration-dossier/-/registered-dossier/28396/7/6/2	NA
Irganox 1010	6683-19-8	Tetracarboxylic acids and derivatives	Subchronic		91	Oral Feed	Dog	322							0.075	100	100	3.22	1	5	1	1	0.644	3.22	3.22	https://pubmed.ncbi.nlm.nih.gov/33038429/	NA
2,6-Di-tert-butylphenol	128-39-2	Phenylpropanes	Multigenerational Repro/Dev Tox	Repro/Dev Tox Screening Test	Females: 14 days prior to pairing, during pairing period, throughout pregnancy, and up to day 3 of lactation Males: 14 days prior to pairing, during pairing period, continued until the day before necropsy	Oral Gavage	Rat	150							42.26	10	10	15	1	10	5	1	1.5	3	15	https://hpvchemicals.oecd.org/ui/handler.axd?id=eee5c430-348b-4b29-a7c4-580889959ee2	NA
Irganox 3114	27676-62-6	Phenylpropanes	Subchronic		92	Oral Feed	Rat	1000							6.34	10	10	100	1	5	1	1	20	100	100	https://echa.europa.eu/fr/registration-dossier/-/registered-dossier/14358/7/6/2	NA
Dimethylsulfide	75-18-3	Dialkylthioethers	Subchronic		98	Oral Gavage	Rat	250							16.41	10	10	25	1	5	1	1	5	25	25	https://echa.europa.eu/fr/registration-dossier/-/registered-dossier/13649/7/6/2	NA
N,N-bis(2-hydroxyethyl) dodecanamide	120-40-1	N-acyl amines	Subchronic		98	Dermal	Mouse	35.7		0.5	2				70.76	2	2	17.85	1	5	1	1	3.57	17.85	17.85	https://echa.europa.eu/fr/registration-dossier/-/registered-dossier/5707/7/6/4	https://echa.europa.eu/fr/registration-dossier/-/registered-dossier/5707/7/2/3
Talc	14807-96-6	Alkaline earth metal silicates	Subchronic		101	Oral Feed	Rat	100							20.79	10	10	10	1	5	1	1	2	10	10	https://echa.europa.eu/fr/registration-dossier/-/registered-dossier/18727/7/6/2	NA
Abietic Acid	514-10-3	Diterpenoids	Subchronic		105	Oral Feed	Rat	100							95.94	1	1	100	1	5	1	1	20	100	100	https://onlinelibrary.wiley.com/doi/pdfdirect/10.1002/3527600418.mb51410kske3413	NA
Maleic Anhydride	108-31-6	Butenolides	Subchronic		180 (6 hours/day, 5 days/week)	Inhalation	Rat	0.4		0.85	1.17647				57.63	2	1.17647	0.34	1	5	1	1	0.068	0.34	0.34	https://pubmed.ncbi.nlm.nih.gov/3371589/	https://apps.who.int/iris/bitstream/handle/10665/44054/9789241580750_eng.pdf?sequence=1&isAllowed=y
Tinuvin 622 (Plastic 622)	65447-77-0	Fatty acid methyl esters	Chronic	Based on a 2y carc study where effect was observed during first 26 weeks	182	Oral Feed	Rat	70		0.58	1.72414				79.93	2	1.72414	40.6	1	1	1	1	40.6	40.6	40.6	https://www.b2bcomposites.com/msds/ted/14549.pdf	https://www.b2bcomposites.com/msds/ted/14549.pdf
Docosanol	661-19-8	Fatty alcohols	Chronic		182	Oral Gavage	Rat	1000							0.027	100	100	10	1	1	1	1	10	10	10	https://pubmed.ncbi.nlm.nih.gov/12383719/	NA
Triethylamine	121-44-8	Trialkylamines	Chronic		196 (6 hours/day, 5 days/week)	Inhalation	Rat	124.9		0.81	1.23457				53.92	2	1.23457	101.169	1	1	1	1	101.169	101.169	101.169	https://database.ich.org/sites/default/files/ICH_Q3C-R8_Guideline_Step4_2021_0422_1.pdf	https://database.ich.org/sites/default/files/ICH_Q3C-R8_Guideline_Step4_2021_0422_1.pdf
(E,E,E,E)-Squalene	111-02-4	Triterpenoids	Subchronic		224	Intramuscular	Dog	0.5		1	1				0.034	100	1	0.5	1	5	1	1	0.1	0.5	0.5	https://www.nap.edu/read/9953/chapter/9#308	https://www.nap.edu/read/9953/chapter/9#308
Diethyleneglycol	111-46-6	Dialkyl ethers	Chronic		225	Oral Feed	Rat	105		0.9	1.11111				63.68	2	1.11111	94.5	1	1	1	1	94.5	94.5	94.5	https://hpvchemicals.oecd.org/ui/SIDS_Details.aspx?id=3972416e-1520-4f47-966b-11a645af70f6	https://echa.europa.eu/fr/registration-dossier/-/registered-dossier/15766/7/2/1
Tinuvin 320	3846-71-7	Phenyl-1,2,3-triazoles	Chronic		364	Oral Gavage	Rat	0.1							80.23	2	2	0.05	1	1	1	1	0.05	0.05	0.05	https://pubmed.ncbi.nlm.nih.gov/18161509/	NA
Tinuvin 327	3864-99-1	Phenyl-1,2,3-triazoles	Chronic		364	Oral Feed	Rat	2.25							51.66	2	2	1.125	1	1	1	1	1.125	1.125	1.125	www.toxplanet.com USEPA Summaries of Toxicity Reports on Tinuvin 327 with Cover Letter January 10 1989	NA
Hexylene Glycol	107-41-5	Tertiary alcohols	Repro/Dev Tox Screening Test		Males: - 4 weeks before pairing - during the pairing period (3 weeks) - until final sacrifice of the females (at least 10 weeks in total) Females: - 4 weeks before pairing - during the mating period (3 weeks) - during gestation - during lactation until day 4 post-partum inclusive (or until sacrifice) - until sacrifice for non-pregnant females	Oral Gavage	Rat	200							69.93	2	2	100	1	10	5	1	10	20	100	https://echa.europa.eu/fr/registration-dossier/-/registered-dossier/14212/7/9/2	NA
Cyclohexane	110-82-7	Cycloalkanes	Multigenerational Repro/Dev Tox		Multigenerational (10 weeks before mating and during pregnancy and rearing of the pups, with the exception of the period from day 21 of gestation until day 4 of lactation; neonates were not exposed to cyclohexane by inhalation during lactation (6 hours/day, 5 days/week))	Inhalation	Rat	209				1	ICH Q3C Solvent	1	51.91	2	1	209	1	1	1	1	209	209	209	http://esis.jrc.ec.europa.eu/doc/risk_assessment/REPORT/cyclohexanereport031.pdf	NA
Chlorobenzene	108-90-7	Chlorobenzenes	Chronic		520	Oral Gavage	Rat	60							46.88	10	10	6	1	1	1	1	6	6	6	http://ntp.niehs.nih.gov/ntp/htdocs/lt_rpts/tr261.pdf	NA
Benzyl alcohol	100-51-6	Benzyl alcohols	Chronic		520	Oral Gavage	Mouse	200				1	Similar properties as ICH Q3C solvent	1	54.16	2	1	200	1	1	1	1	200	200	200	https://ntp.niehs.nih.gov/go/tr343	NA
1,1,2,2,-Tetrachloroethane	79-34-5	Organochlorides	Chronic		546	Oral Gavage	Rat		43	0.9	1.11111				7.38	10	1.11111	38.7	10	1	1	1	3.87	3.87	3.87	https://ntp.niehs.nih.gov/go/tox049	https://ofmpub.epa.gov/eims/eimscomm.getfile?p_download_id=491566
Diethanolamine	111-42-2	1,2-aminoalcohols	Chronic		721	Dermal	Rat	5.7		0.03	33.3333				58.34	2	33.3333	0.171	1	1	1	1	0.171	0.171	0.171	https://ntp.niehs.nih.gov/ntp/htdocs/lt_rpts/tr478.pdf?utm_source=direct&utm_medium=prod&utm_campaign=ntpgolinks&utm_term=tr478	https://pubmed.ncbi.nlm.nih.gov/9253149/
Resorcinol	108-46-3	Resorcinols	Chronic		721	Oral (Not Specified)	Rat	50							58.05	2	2	25	1	1	1	1	25	25	25	https://echa.europa.eu/registration-dossier/-/registered-dossier/13740	NA
Tributyl phosphate	126-73-8	Trialkyl phosphates	Chronic		728	Oral Feed	Rat	8.9		1	1				89.19	2	1	8.9	1	1	1	1	8.9	8.9	8.9	http://webnet.oecd.org/hpv/ui/Search.aspx	http://www.bgrci.de/fachwissen-portal/topic-list/hazardous-substances/toxikologische-datensaetze-en/list-of-substances-with-information-about-toxicological-evaluations-and-experimental-studies/
Meso- erythritol	149-32-6	Sugar alcohols	Chronic		728	Oral Feed	Rat	900		0.9	1.11111				53.97	2	1.11111	810	1	1	1	1	810	810	810	https://pubmed.ncbi.nlm.nih.gov/8933643/	http://ec.europa.eu/food/fs/sc/scf/out175_en.pdf
Phthalimide	85-41-6	Phthalimides	Pre, Post-Natal including Maternal Function		Males: 46 days, Females: 14 days before mating to day 3 post parturition	Oral Gavage	Rat	250							81.77	2	2	125	1	1	1	1	125	125	125	https://echa.europa.eu/it/registration-dossier/-/registered-dossier/13146/7/9/3	NA
Bromide	24959-67-9	Alkali metal bromides	Chronic		728	Oral Feed	Rat		16.5						88.25	2	2	8.25	3	1	1	1	2.75	2.75	2.75	https://pubmed.ncbi.nlm.nih.gov/2341089/	NA
2,4,6-tri-tert-butylphenol	732-26-3	Phenylpropanes	Chronic		730	Oral Feed	Rat	1.5							24.44	10	10	0.15	1	1	1	1	0.15	0.15	0.15	https://www.jstage.jst.go.jp/article/jts1976/16/4/16_4_167/_article	NA
Bisphenol A Diglycidyl	1675-54-3	Diphenylmethanes	Chronic		730	Oral Gavage	Rat	15							12.88	10	10	1.5	1	1	1	1	1.5	1.5	1.5	NA	NA
Acetic Acid	64-19-7	Carboxylic acids	Embryo-Fetal		Gestation days 6-18	Oral Gavage	Rabbit	1600				1	ICH Q3C Solvent	1	73.87	2	1	1600	1	10	5	1	160	320	1600	https://ntrl.ntis.gov/NTRL/dashboard/searchResults/titleDetail/PB234869.xhtml	NA
Santonox	96-69-5	Diarylthioethers	Chronic		730	Oral Feed	Rat	20							1.08	10	10	2	1	1	1	1	2	2	2	https://ntp.niehs.nih.gov/ntp/htdocs/lt_rpts/tr435.pdf	NA
Paraffin	8002-74-2	N/A	Other	Liquid Paraffin is also considered mineral oil and is administered orally for constipation at 15-45 ml/day	NA	Oral (Not Specified)	Human	300		0.015	66.6667				#N/A	#N/A	66.6667	4.5	1	10	5	1	0.45	0.9	4.5	www.micromedexsolutions.com: Martindale - The Complete Drug Reference: Liquid Paraffin	https://pubmed.ncbi.nlm.nih.gov/5918529/
Morpholine	110-91-8	Morpholines	Chronic		730 (6 hours/day, 5 days/week)	Inhalation	Rat	22		0.55	1.81818				62.87	2	1.81818	12.1	1	1	1	1	12.1	12.1	12.1	https://echa.europa.eu/registration-dossier/-/registered-dossier/13364/7/6/1	https://hpvchemicals.oecd.org/ui/handler.axd?id=e0b29e5b-ce25-4a76-8fbd-375360b7a27f
2-ethyl-1-hexanol	104-76-7	Fatty alcohols	Chronic		730	Oral Gavage	Rat	36							63.07	2	2	18	1	1	1	1	18	18	18	https://pubmed.ncbi.nlm.nih.gov/8998951/	NA
Cyasorb UV-1988	7443-25-6	Cinnamic acid esters	Combined Repeat-Dose and Repro/Dev Tox Screening Test		Males: dose daily 2 weeks prior to mating, and throughout mating period and 2 weeks post mating Females: dose daily, 2 weeks before mating period, throughout mating, pregnancy an up to lactation day 13	Oral Gavage	Rat	300							88.01	2	2	150	1	10	5	1	15	30	150	https://echa.europa.eu/registration-dossier/-/registered-dossier/25520/7/6/2	NA
C.I. Pigment Blue 29	57455-37-5	Post-transition metal silicates	Other	42 Days for males, 14 Days before mating to day 4 of lactation for females, 42 Days for the satellite group for recovery of females	42	Oral Gavage	Rat	300							12.57	10	10	30	1	10	5	1	3	6	30	https://dra4.nihs.go.jp/mhlw_data/home/file/file57455-37-5.html	NA
Hydroxypropyl methacrylate	27813-02-1	Alpha,beta-unsaturated carboxylic esters	Combined Repeat-Dose and Repro/Dev Tox Screening Test		Male: 49 days Females: 14 days before mating to day 3 of lactation	Oral Gavage	Rat	300							75.95	2	2	150	1	10	5	1	15	30	150	https://echa.europa.eu/registration-dossier/-/registered-dossier/14978/7/6/2	NA
2-Phenylphenol	90-43-7	Biphenyls and derivatives	Chronic		730	Oral Feed	rat	39		0.95	1.05263				75.1	2	1.05263	37.05	1	1	1	1	37.05	37.05	37.05	https://echa.europa.eu/registration-dossier/-/registered-dossier/2168/7/10/2	https://pubmed.ncbi.nlm.nih.gov/6821879/
Irgafos 168 Chem name: tris(2,4-di-tert-butylphenyl)phosphite	31570-04-4	Phenylpropanes	Chronic		730	Oral Feed	Rat	58							0.025	100	100	0.58	1	1	1	1	0.58	0.58	0.58	NA	NA
Tri(nonylphenyl)phosphite	26523-78-4	Phenoxy compounds	Chronic		730	Oral Feed	Dog	83							0.11	100	100	0.83	1	1	1	1	0.83	0.83	0.83	www.toxplanet.com Screening-Level Hazard Characterization Tris(nonylphenyl) Phosphite June 2010	NA
Hostanox 03	32509-66-3	Bisphenols	Chronic		730	Oral Feed	Dog	84.6		0.01	100				0.38	100	100	0.846	1	1	1	1	0.846	0.846	0.846	https://echa.europa.eu/registration-dossier/-/registered-dossier/28053/7/1	https://echa.europa.eu/registration-dossier/-/registered-dossier/28053/7/2/1
Ethylbenzene	100-41-4	Benzene and substituted derivatives	Chronic		730 (6 hours/day, 5 days/week)	Inhalation	Mouse	89				1	ICH Q3C Solvent	1	53.66	2	1	89	1	1	1	1	89	89	89	https://ntp.niehs.nih.gov/ntp/htdocs/lt_rpts/tr466.pdf	NA
Terephthalic acid	100-21-0	P-phthalic acid and derivatives	Chronic		730	Oral Feed	Rat	142		0.85	1.17647				91.3	1	1.17647	120.7	1	1	1	1	120.7	120.7	120.7	http://documents.tscats.net/file-support/OTS00001901.pdf	https://echa.europa.eu/registration-dossier/-/registered-dossier/15563
Distearyl pentaerythritol diphosphite	3806-34-6	Trialkylphosphites	Chronic		730	Oral Feed	Rat	150		0.5	2				0.007	100	2	75	1	1	1	1	75	75	75		https://echa.europa.eu/registration-dossier/-/registered-dossier/11711/1
Irganox 565	991-84-4	Phenylpropanes	Chronic		730	Oral Feed	Rat	200		0.01	100				0.6	100	100	2	1	1	1	1	2	2	2	https://echa.europa.eu/nl/registration-dossier/-/registered-dossier/11227	https://echa.europa.eu/nl/registration-dossier/-/registered-dossier/11227
Tinuvin 326	3896-11-5	Benztriazole	Chronic		730	Oral Feed	Rat	380							79.92	2	2	190	1	1	1	1	190	190	190	https://echa.europa.eu/registration-dossier/-/registered-dossier/5785/1	NA
Triethyl Citrate	77-93-0	Tricarboxylic acids and derivatives	Chronic		730	Oral Feed	Rat	600							84.14	2	2	300	1	1	1	1	300	300	300	https://echa.europa.eu/registration-dossier/-/registered-dossier/14584/7/8	NA
Benzoic Acid	65-85-0	Benzoic acids	Multigenerational Repro/Dev Tox	4 generation reproductive study	Four generation study	Oral Feed	Rat	500		1	1				90.62	1	1	500	1	1	1	1	500	500	500	https://ec.europa.eu/health/ph_risk/committees/04_sccp/docs/sccp_o_015.pdf	http://www.inchem.org/documents/cicads/cicads/cicad26.htm
Polydimethylsiloxanes	63148-62-9	Siloxanes	Chronic		730	Oral Feed	Rat	1000		0.01	100				43.59	10	100	10	1	1	1	1	10	10	10	https://www.ecetoc.org/wp-content/uploads/2014/08/JACC-055-Linear-Polydimethylsiloxanes-CAS-No.-63148-62-9-Second-Edition.pdf	NA
Polyethylene Glycol 25322	25322-68-3	Polyethylene glycols	Chronic		730	Oral Feed	Rat	2000							75.57	2	2	1000	1	1	1	1	1000	1000	1000	https://efsa.onlinelibrary.wiley.com/doi/pdf/10.2903/j.efsa.2007.414	NA
Isopropyl Alcohol	67-63-0	Secondary alcohols	Chronic		730 (6 hours/day, 5 days/week)	Inhalation	Rat	2189				1	ICH Q3C Solvent	1	56.89	2	1	2189	1	1	1	1	2189	2189	2189	https://echa.europa.eu/it/registration-dossier/-/registered-dossier/15339/7/8	NA
Dimethyl Terephthalate	120-61-6	Phthalate esters	Chronic		730	Oral Feed	Rat		176	0.9	1.11111				84.05	2	1.11111	158.4	3	1	1	1	52.8	52.8	52.8	https://pubmed.ncbi.nlm.nih.gov/12799671/	https://pubmed.ncbi.nlm.nih.gov/1227290/
Formaldehyde	50-00-0	Carbonyl compounds	Chronic		730 (6 hours/day, 5 days/week)	Inhalation	Rat	0.9				1	MW <250 Da and inhalation	1	27.87	10	1	0.9	1	1	1	1	0.9	0.9	0.9	https://pubmed.ncbi.nlm.nih.gov/29408293/	NA
Irganox 1098	23128-74-7	Phenylpropanes	Chronic		735	Oral Feed	Rat	191.5		0.02	50				1.81	10	50	3.83	1	1	1	1	3.83	3.83	3.83	https://echa.europa.eu/nl/registration-dossier/-/registered-dossier/15308/5/3/2/?documentUUID=03de32af-a77f-447c-8947-2249a033eeaa	https://echa.europa.eu/nl/registration-dossier/-/registered-dossier/15308/5/3/2/?documentUUID=03de32af-a77f-447c-8947-2249a033eeaa
Phthalic anhydride	85-44-9	Phthalic anhydrides	Chronic		735	Oral Feed	Rat	529							74	2	2	264.5	1	1	1	1	264.5	264.5	264.5	https://echa.europa.eu/it/registration-dossier/-/registered-dossier/15845/7/6/2	NA
Irganox 259	35074-77-2	Phenylpropanes	Chronic		756	Oral Feed	Rat	15.4							1.07	10	10	1.54	1	1	1	1	1.54	1.54	1.54	https://echa.europa.eu/registration-dossier/-/registered-dossier/16505/7/6/2/?documentUUID=2c4a88a1-3ecd-41b7-8759-487862e9695a	NA
Tert-Butylhydroquinone	1948-33-0	Phenylpropanes	Chronic		819	Oral Feed	Dog	72		1	1				73.25	2	1	72	1	1	1	1	72	72	72	https://apps.who.int/iris/bitstream/handle/10665/42142/WHO_TRS_884.pdf;jsessionid=08751DD2074673512F80175B54F1C74F?sequence=1 https://efsa.onlinelibrary.wiley.com/doi/epdf/10.2903/j.efsa.2004.84	https://efsa.onlinelibrary.wiley.com/doi/epdf/10.2903/j.efsa.2004.84
Naphthalene	91-20-3	Naphthalenes	Chronic		735 (6 hours/day, 5 days/week)	Inhalation	Rat		6.1			1	MW <250 Da and inhalation	1	73.22	2	1	6.1	10	1	1	1	0.61	0.61	0.61	https://echa.europa.eu/registration-dossier/-/registered-dossier/15924/7/8	NA
Phenol, 4-(1-methyl-1-phenylethyl)	599-64-4	Diphenylmethanes	Combined Repeat-Dose and Repro/Dev Tox Screening Test		Males: 28 days (2 week pre-breed and 2 week mating period); Females 56-70 days (2 week pre-breed through mating, gestation and lactation), F1 pups 49 days (from weaning (post-natal day 22)	Oral Gavage	Rat	50							61.48	2	2	25	1	10	5	1	2.5	5	25	https://echa.europa.eu/registration-dossier/-/registered-dossier/24175	NA
DEP	84-66-2	Benzoic acid esters	Subchronic		112	Oral Feed	Rat	750		0.85	1.17647				90.75	1	1.17647	637.5	1	5	1	1	127.5	637.5	637.5	https://echa.europa.eu/registration-dossier/-/registered-dossier/24176	http://www.inchem.org/documents/cicads/cicads/cicad52.htm#8.3
Decamethylcyclopentasiloxane	541-02-6	Organoheterosilanes	Chronic		730 (6 hours/day, 5 days/week)	Inhalation	Rat	73		0.05	20				52.61	2	20	3.65	1	1	1	1	3.65	3.65	3.65	https://echa.europa.eu/it/registration-dossier/-/registered-dossier/14807/7/6/1	https://ec.europa.eu/health/scientific_committees/emerging/docs/scenihr_o_043.pdf
Cyclic Dimethylsiloxanes-D06	540-97-6	Organoheterosilanes	Combined Repeat-Dose and Repro/Dev Tox Screening Test		Males: 28 days (including 14 days prior to mating), Females: 46 days (14 days prior to mating to postnatal day 3)	Oral Gavage	Rat	1000		0.12	8.33333				46.77	10	8.33333	120	1	10	5	1	12	24	120	https://hpvchemicals.oecd.org/ui/handler.axd?id=bdbde485-8087-4034-83d9-cd0c9af7e4de	https://hpvchemicals.oecd.org/ui/handler.axd?id=bdbde485-8087-4034-83d9-cd0c9af7e4de
Octamethyl Cyclotetrasiloxane	556-67-2	Organoheterosilanes	Chronic		730 (6 hours/day, 5 days/week)	Inhalation	Rat	220		0.05	20				78.72	2	20	11	1	1	1	1	11	11	11	https://pubmed.ncbi.nlm.nih.gov/28676441/	https://pubmed.ncbi.nlm.nih.gov/28645863/
Irganox 1330	1709-70-2	Linear diarylheptanoids	Chronic		730	Oral Feed	Rat	705		0.002	500				0.023	100	500	1.41	1	1	1	1	1.41	1.41	1.41	www.toxplanet.com IUCLID Dataset hexamethyldisiloxane February 2000	NA
Hexamethyldisiloxane	107-46-0	Disiloxanes	Subacute		28	Oral Gavage	Rat	160							41.06	10	10	16	1	10	5	1	1.6	3.2	16	https://echa.europa.eu/registration-dossier/-/registered-dossier/15156/1/1	NA
Dextran	9004-54-0		Subacute		28	Intravenous	Rat	500		1	1				#N/A	#N/A	1	500	1	10	5	1	50	100	500	https://pubmed.ncbi.nlm.nih.gov/25378808/	NA
2-Butoxyethyl acetate	112-07-2	Carboxylic acid esters	Chronic		280 (4 hours/day, 5 days/week)	Inhalation	Rat	52.5				1	MW <250 Da and inhalation	1	78.3	2	1	52.5	1	1	1	1	52.5	52.5	52.5	https://echa.europa.eu/it/registration-dossier/-/registered-dossier/16067/7/6/3/?documentUUID=474e215b-3d9b-4c99-b0ce-38a9d874d768	NA
Diethylene glycol monohexyl ether	112-59-4	Dialkyl ethers	Combined Repeat-Dose and Repro/Dev Tox Screening Test		Males: 14 days priorto matering and continued throughout mating (Total 33 days) Females: 14 days prior to mating, throughout breeding , gestation, and lactation (total 39-52 days)	Oral Feed	Rat	300							59.79	2	2	150	1	10	5	1	15	30	150	https://echa.europa.eu/registration-dossier/-/registered-dossier/5882/7/6/2	NA
Zinc Octanoate	557-09-5	Medium-chain fatty acids	Subchronic		40 (4 hours/day, 5 days/week)	Inhalation	Rat		11.25			0.1	Absoprtion of zinc compounds about 20%	10	94.22	1	10	1.125	3	5	1	1	0.075	0.375	0.375	https://pubmed.ncbi.nlm.nih.gov/4472109/	https://echa.europa.eu/it/registration-dossier/-/registered-dossier/24877/7/2/1
Triacetin	102-76-1	Triacylglycerols	Combined Repeat-Dose and Repro/Dev Tox Screening Test		Males: 14 days prior to mating (total 44 days) Females: 14 days prior to mating to day 3 post-partum (total: 41-48 days)	Oral Gavage	Rat	1000							79.08	2	2	500	1	10	5	1	50	100	500	https://echa.europa.eu/registration-dossier/-/registered-dossier/15139/7/6/1	NA
1-Octadecanol	112-92-5	Long-chain fatty alcohols	Subchronic		45 and 54	Oral Feed	Rat	2000		0.01	100				0.039	100	100	20	1	5	1	1	4	20	20	https://www.echa.europa.eu/web/guest/registration-dossier/-/registered-dossier/15937/1	https://echa.europa.eu/registration-dossier/-/registered-dossier/15937/7/2/1
Triethylene glycol monobutyl ether	143-22-6	Polyethylene glycols	Embryo-Fetal		Gestation days 6-15	Oral Gavage	Rat	1000							67.6	2	2	500	1	10	5	1	50	100	500	https://journals.sagepub.com/doi/10.3109/10915819009078759	NA
Chimassorb 81	1843-05-6	Benzophenones	Combined Repeat-Dose and Repro/Dev Tox Screening Test		Males: 70 day premating period, 14 day mating period, 2 days post-mating Females: 14 days premating, and entire gestation period and up to 30 day laction period (includes lactation period and postweaning)	Oral Gavage	Rat	1000							19.16	10	10	100	1	10	5	1	10	20	100	https://echa.europa.eu/registration-dossier/-/registered-dossier/13351	NA
2,2’-Methylene-bis(6-tert-butyl-4 methylphenol)	119-47-1	Diphenylmethanes	Repro/Dev Tox Screening Test		Males: 50-52 days, Females 40-48 days (14 days before mating to day 3 of lacation)	Oral Gavage	Rat	12.5							3.69	10	10	1.25	1	10	5	1	0.125	0.25	1.25	https://echa.europa.eu/it/registration-dossier/-/registered-dossier/13380/7/9/1	NA
2-Butoxyethanol	111-76-2	Dialkyl ethers	Chronic		728 (5 days/week, 6 hours/day)	Inhalation	Rat	37		0.88	1.13636				57.7	2	1.13636	32.56	1	1	1	1	32.56	32.56	32.56	https://ntp.niehs.nih.gov/ntp/htdocs/lt_rpts/tr484.pdf	https://pubmed.ncbi.nlm.nih.gov/1609415/
Polyethylene glycol ether with 1,4-diisobutyl-1,4-dimethylbutynediol (Surfynol)	9014-85-1	Polyethylene glycols	Multigenerational Repro/Dev Tox		One generation study and F1a weanlings Males: 91 days, through F1a generation Females: 91 days, through F1a generation	Oral Feed	Rat	1000							9.58	10	10	100	1	10	5	1	10	20	100	https://echa.europa.eu/registration-dossier/-/registered-dossier/11826/7/9/2/?documentUUID=753fec70-cca4-4946-9060-a10b65efef9c	NA
Tert-butyl methyl ether	1634-04-4	Dialkyl ethers	Chronic		728 (5 days/week, 6 hours/day)	Inhalation	Rat	175				1	ICH Q3C Solvent	1	48.76	10	1	175	1	1	1	1	175	175	175	https://echa.europa.eu/registration-dossier/-/registered-dossier/15543/7/6/3	ICH Q3C Solvent
Thiourea	62-56-6	Thioureas	Chronic		730-1095	Oral Drinking Water	Rat	6.88							42.33	10	10	0.688	1	1	1	1	0.688	0.688	0.688	https://echa.europa.eu/lt/registration-dossier/-/registered-dossier/11868/7/6/2	NA
Phthalic Acid	88-99-3	Benzoic acids	Embryo-Fetal		Gestation days 7-16	Oral Feed	Rat	1021		0.2	5				87.83	2	5	204.2	1	10	5	1	20.42	40.84	204.2	https://pubmed.ncbi.nlm.nih.gov/9486946/	https://pubmed.ncbi.nlm.nih.gov/4433845/
Diethylene glycol monobutyl ether	112-34-5	Dialkyl ethers	Subchronic		90 (6 hours/day)	Inhalation	Rat	11.3				1	MW <250 Da and inhalation	1	64.17	2	1	11.3	1	5	1	1	2.26	11.3	11.3	https://echa.europa.eu/documents/10162/03fc9742-50ef-4595-9cf7-d832a074c1c2	NA
2-Butanone	78-93-3	Ketones	Embryo-Fetal		Gestation days 6-15 (7 hrs/day)	Inhalation	Mouse	1246				1	ICH Q3C Solvent	1	46.67	10	1	1246	1	1	1	1	1246	1246	1246	https://pubmed.ncbi.nlm.nih.gov/1884913/	NA
2-(2-Methoxyethoxy)-ethanol	111-77-3	Dialkyl ethers	Subchronic		90 (6 hours/day, 5 days/week)	Inhalation	Rat	26				1	MW <250 Da and inhalation	1	62.58	2	1	26	1	5	1	1	5.2	26	26	https://pubmed.ncbi.nlm.nih.gov/4092879/	NA
2-(2-Ethoxyethoxy)ethanol acetate	112-15-2	Carboxylic acid esters	Subchronic		91 (5 days/week, 6 hours/day)	Inhalation	Rat	62.9				1	MW <250 Da and inhalation	1	76.58	2	1	62.9	1	5	1	1	12.58	62.9	62.9	https://echa.europa.eu/registration-dossier/-/registered-dossier/14487/7/6/3	NA
Cyasorb UV 2908	67845-93-6	p-Hydroxybenzoic acid esters	Subchronic		96 – 99	Oral	Dog	1							0.6	100	100	0.01	1	5	1	1	0.002	0.01	0.01	https://echa.europa.eu/lt/registration-dossier/-/registered-dossier/5453	NA
Ethyl Acetate	141-78-6	Carboxylic acid esters	Subchronic		99 - 100 (6 hours/day, 5 days/week, 68-69 exposures)	Inhalation	Rat	152.5				1	ICH Q3C Solvent	1	62.98	2	1	152.5	1	5	1	1	30.5	152.5	152.5	https://pubmed.ncbi.nlm.nih.gov/14637381/	ICH Q3 Solvent
2-ethylphenol	90-00-6	1-hydroxy-4-unsubstituted benzenoids	Combined Repeat-Dose and Repro/Dev Tox Screening Test		Male: 28 days premating and mating, Females: 54 days of premating, mating, gestation and lacation	Oral Gavage	Rat	245							65.84	2	2	122.5	1	10	5	1	12.25	24.5	122.5	www.toxplanet.com Initial Risk-Based Prioritization of High Production Volume Chemicals: Ethylphenols Category September 2008	NA
Stearic Acid	57-11-4	Long-chain fatty acids	Other	Human dietary study	28	Oral (Not Specified)	Human	250							81.96	2	2	125	1	10	5	1	12.5	25	125	https://pubmed.ncbi.nlm.nih.gov/11305631/	NA
DEHP - Diethylhexyl Phthalate	117-81-7	Benzoic acid esters	Subchronic		91	Oral Feed	Rat	3.7		0.1	10				1.59	10	10	0.37	1	5	1	1	0.074	0.37	0.37	https://pubmed.ncbi.nlm.nih.gov/9146736/	https://op.europa.eu/en/publication-detail/-/publication/80eaeafa-5985-4481-9b83-7b5d39241d52
Diphenylamine	122-39-4	Aniline and substituted anilines	Chronic		730	Oral Feed	Rat	7.5		0.68	1.47059				75.59	2	1.47059	5.1	1	1	1	1	5.1	5.1	5.1	https://ec.europa.eu/health/archive/ph_risk/committees/04_scher/docs/scher_o_074.pdf	https://ec.europa.eu/health/archive/ph_risk/committees/04_scher/docs/scher_o_074.pdf
Ethanol	64-17-5	Primary alcohols	Embryo-Fetal		Gestation day 10	Intraperitoneal	Mouse	4000		1	1				31.52	10	1	4000	1	1	1	1	4000	4000	4000	https://pubmed.ncbi.nlm.nih.gov/6364455/	NA
Isoprene	78-79-5	Branched unsaturated hydrocarbons	Chronic		140-560 (6 hours/day, 5 days/week)	Inhalation	Mouse	7.7		0.5	2				54.68	2	2	3.85	1	1	1	1	3.85	3.85	3.85	https://echa.europa.eu/it/registration-dossier/-/registered-dossier/16096/7/6/1	https://efsa.onlinelibrary.wiley.com/doi/epdf/10.2903/j.efsa.2008.918
Phenol	108-95-2	1-hydroxy-4-unsubstituted benzenoids	Subacute		14	Oral Gavage	Rat	12		1	1				52.32	2	1	12	1	10	5	1	1.2	2.4	12	http://echa.europa.eu/web/guest/information-on-chemicals/registered-substances#search	http://echa.europa.eu/web/guest/information-on-chemicals/registered-substances#search
Di-N-octyl phthalate	117-84-0	Benzoic acid esters	Subchronic		91	Oral Feed	Rat	36.8							0.84	100	100	0.368	1	5	1	1	0.0736	0.368	0.368	https://www.industrialchemicals.gov.au/sites/default/files/PEC39-Diisodecyl-phthalate-DIDP-Di-n-octyl-phthalate-DnOP.pdf	NA
Methanol	67-56-1	Primary alcohols	Other	Acute tox gavage for 3 days	3	Oral Gavage	Monkey	6000				1	ICH Q3C Solvent	1	25.07	10	1	6000	1	10	5	1	600	1200	6000	https://pubmed.ncbi.nlm.nih.gov/13228552/	NA
Diisononyl cyclohexane-1, 2-dicarboxylate	474919-59-0	N/A	Subchronic		90	Oral Feed	Rat	40		0.5	2				#N/A	#N/A	2	20	1	5	1	1	4	20	20	https://pubmed.ncbi.nlm.nih.gov/24627975/	https://pubmed.ncbi.nlm.nih.gov/24627975/
Octanoic Acid	124-07-2	Medium-chain fatty acids	Combined Repeat-Dose and Repro/Dev Tox Screening Test		28	Oral Gavage	Rat		62.5						94.22	1	1	62.5	3	10	5	1	2.08333	4.16667	20.8333	https://dra4.nihs.go.jp/mhlw_data/home/pdf/PDF124-07-2d.pdf	NA
Tinuvin P (Drometrizole)	2440-22-4	Phenyl-1,2,3-triazoles	Chronic		730	Oral Feed	Rat	47							91.86	1	1	47	1	1	1	1	47	47	47	https://www.epa.gov/sites/production/files/2015-04/documents/benzotriazole.pdf	NA
Benzophenone	119-61-9	Benzophenones	Multigenerational Repro/Dev Tox		Males: started from age of 5 weeks to 10 weeks Females: lasted 10 weeks or more through the pre-mating, mating, gestational, lactational and during weaing until PND21	Oral Feed	Rat		6.5	0.8	1.25				82.3	2	1.25	5.2	3	1	1	1	1.73333	1.73333	1.73333	NA	https://ntp.niehs.nih.gov/ntp/htdocs/lt_rpts/tr533.pdf?utm_source=direct&utm_medium=prod&utm_campaign=ntpgolinks&utm_term=tr533
Tri-2-ethylhexyl trimellitate	3319-31-1	Benzoic acid esters	Repro/Dev Tox Screening Test		Males: 14 days pre-mating, (total 46 days) Females: 14 days pre-mating, through day 3 oflctation	Oral Gavage	Rat	100		0.15	6.66667				0.35	100	6.66667	15	1	10	5	1	1.5	3	15	https://echa.europa.eu/registration-dossier/-/registered-dossier/14933/7/9/1	ICHQ3D
Thiodipropionic Acid	111-17-1	Dicarboxylic acids and derivatives	Repro/Dev Tox Screening Test		Males: 14 days pre-mating, 14 days during mating period , and 24 days postmating period (total: 52 days) Females: 14 days pre-mating, mating period until 3 days postpartum lactation (total: 41 to 45 days)	Oral Gavage	Rat	100		1	1				79.92	2	1	100	1	1	1	1	100	100	100	https://dra4.nihs.go.jp/mhlw_data/jsp/SearchPageENG.jsp	https://eur-lex.europa.eu/LexUriServ/LexUriServ.do?uri=OJ:L:2008:353:0001:1355:EN:PDF
Mesityl Oxide	141-79-7	Alpha,beta-unsaturated ketones	Combined Repeat-Dose and Repro/Dev Tox Screening Test		Males: 49 day Females: 14 days pre-mating, 1-14 days mating, 21-22 days during gestaton, 4 days for lactation period (total: 36-49 days) (6 hours/day, 7 days/week)	Inhalation	Rat		21			1	MW <250 Da and inhalation	1	48.03	10	1	21	3	10	5	1	0.7	1.4	7	https://pubmed.ncbi.nlm.nih.gov/29408293/, https://echa.europa.eu/registration-dossier/-/registered-dossier/2148/7/6/1	NA
Methyl Methacrylate	80-62-6	Alpha,beta-unsaturated carboxylic esters	Chronic		728	Oral Drinking Water	Rat	124		1	1				65.84	2	1	124	1	1	1	1	124	124	124	https://pubmed.ncbi.nlm.nih.gov/14105896/	https://iris.epa.gov/static/pdfs/1000_summary.pdf
Irgacure 907	71868-10-5	Aryl ketones	Pre, Post-Natal including Maternal Function		Males: 70 days before mating, during mating, until termination, Females: 14 days before mating, duing mating, and until gestation day 19 or weaning	Oral Gavage	Rat		40						33.11	10	10	4	10	1	1	1	0.4	0.4	0.4	http://documents.tscats.net/file-support/OTS0601346.pdf	NA
Dibutyl phthalate	84-74-2	Benzoic acid esters	Subchronic		90	Oral Feed	Rat	177		0.5	2				87.24	2	2	88.5	1	5	1	1	17.7	88.5	88.5	http://www.inchem.org/documents/ehc/ehc/ehc189.htm	NA
Diphenyl ether	101-84-8	Diphenylethers	Embryo-Fetal		Gestation days 6-15	Oral Gavage	Rat		50						69.65	2	2	25	3	10	5	1	0.833333	1.66667	8.33333	https://echa.europa.eu/registration-dossier/-/registered-dossier/14971/7/9/3	NA
1,6-Hexanedioldiacrylate	13048-33-4	Dicarboxylic acids and derivatives	Combined Repeat-Dose and Repro/Dev Tox Screening Test		Males: 14 days prior to mating and throughout the mating period (total: 28 doses) Females: 14 days pre-mating period through to day 4 of the lactation period (total of 41-49 days)	Oral Gavage	Rat	250		1	1				92.24	1	1	250	1	10	5	1	25	50	250	https://echa.europa.eu/registration-dossier/-/registered-dossier/14690	NA
Dilauryl thiodipropionate	123-28-4	Dicarboxylic acids and derivatives	Subchronic		91	Oral Gavage	Rat	350		1	1				0.049	100	1	350	1	5	1	1	70	350	350	https://echa.europa.eu/registration-dossier/-/registered-dossier/13602/7/6/2	https://elsiedatabase.org/Reports/123-28-4.html#ChemicalSummary
Cyclohexanone	108-94-1	Cyclic ketones	Chronic		721	Oral Drinking Water	Rat	462				1	ICH Q3C Solvent	1	49.59	10	1	462	1	1	1	1	462	462	462	www.toxplanet.com Provisional Peer-Reviewed Toxicity Values for Cyclohexanone (CASRN 108-94-1) September 2010
ESBO	8013-07-8	Triacylglycerols	Chronic		730	Oral Feed	Rat	1000							0.045	100	100	10	1	1	1	1	10	10	10	https://echa.europa.eu/registration-dossier/-/registered-dossier/15408/1/1	NA
1-Tetradecene	1120-36-1	Unsaturated aliphatic hydrocarbons	Combined Repeat-Dose and Repro/Dev Tox Screening Test		Males; 28 days pre-mating (total 47 days) Females: 14 days pre-mating through lactation day 4 (total: 42 to 51 days)	Oral Gavage	Rat	1000							0.041	100	100	10	1	10	5	1	1	2	10	https://www.tandfonline.com/doi/abs/10.1081/dct-100100118?journalCode=idct20	NA
Isobutene	115-11-7	Branched unsaturated hydrocarbons	Subchronic		98 (6 hours/day, 5 days/week)	Inhalation	Rat	2240		0.08	12.5				55.56	2	12.5	179.2	1	5	1	1	35.84	179.2	179.2	https://ntp.niehs.nih.gov/ntp/htdocs/lt_rpts/tr487.pdf?utm_source=direct&utm_medium=prod&utm_campaign=ntpgolinks&utm_term=tr487	https://echa.europa.eu/registration-dossier/-/registered-dossier/16106/7/2/2
T-butanol	75-65-0	Tertiary alcohols	Chronic		730	Oral Drinking Water	Rat		90			1	ICH Q3C Solvent	1	55.92	2	1	90	10	1	1	1	9	9	9	https://ntp.niehs.nih.gov/ntp/htdocs/lt_rpts/tr436.pdf	ICHQ3C Solvent
2,4,4-Trimethyl-2-pentene	107-40-4	Branched unsaturated hydrocarbons	Repro/Dev Tox Screening Test		Males: pre-mating period, mating, gestation, and up to lactation day 4 (Total: 40-46 days) Females: pre-mating period, mating, gestation, and up to lactation day 4 (Total: 40-46 days)	Oral Gavage	Rat	1000							33.92	10	10	100	1	5	1	1	20	100	100	https://echa.europa.eu/documents/10162/10656235-2b4a-45dd-a1c6-a00312c69bd5	NA
Diisobutyl phthalate	84-69-5	Benzoic acid esters	Repro/Dev Tox Screening Test		Gestation days 12-21	Oral Gavage	Rat		125						88.93	2	2	62.5	10	1	1	1	6.25	6.25	6.25	https://pubmed.ncbi.nlm.nih.gov/18706996/	NA
